# Supplementary material for: Near isogenic lines (NIL) of sorghum carrying wild type or waxy alleles of the granule-bound starch synthase (GBSS) gene have distinct effects on human gut microbiome phenotypes and host physiological characteristics
Source: Research Square preprint supplement (doi:10.21203/rs.3.rs-1405055/v1), 2022-03-03
Supplement: Supplementary file 1 [file 6a90b8749df4e37846b05c7f.docx]

Supplementary Table 1. Composition of experimental diets.

|  | **Low Fiber** | **Wild type sorghum Diet** | **Waxy**  **sorghum diet** |
| --- | --- | --- | --- |
|  | **g %** | **g %** | **g %** |
| Protein | 20.3 | 20.3 | 20.3 |
| Carbohydrate | 68.9 | 68.9 | 68.9 |
| Fat | 7.0 | 7.0 | 7.0 |
|  |  |  |  |
|  | **kcal%** | **kcal%** | **kcal%** |
| Protein | 19 | 19 | 19 |
| Carbohydrate | 66 | 66 | 66 |
| Fat | 15 | 15 | 15 |
|  |  |  |  |
| **Ingredient quantity** | **g** | **g** | **g** |
| Casein | 200 | 200 | 200 |
| L-Cystine | 3 | 3 | 3 |
| Dextrose | 680 | 480 | 480 |
| Soybean Oil | 70 | 70 | 70 |
| t-Butylhydroquinone | 0.014 | 0.014 | 0.014 |
| Mineral Mix S10022G | 35 | 35 | 35 |
| Vitamin Mix V10037 | 40 | 40 | 40 |
| Choline Bitartrate | 2.5 | 2.5 | 2.5 |
| Sorghum Flour, Wild type | 0 | 200 | 0 |
| Sorghum Flour, Waxy | 0 | 0 | 200 |
| FD&C Red Dye #40 | 0 | 0.05 | 0 |
| FD&C Blue Dye #1 | 0 | 0 | 0.05 |
| Total | 1000 | 1000 | 1000 |
| Energy density (kcal/g) | 4.0 | 4.2 | 4.2 |
|  |  |  |  |
|  |  |  |  |
|  |  |  |  |
